# Supplementary material for: Early Pregnancy Human Decidua is Enriched with Activated, Fully Differentiated and Pro-Inflammatory Gamma/Delta T Cells with Diverse TCR Repertoires
Source: MDPI journal article supplement (doi:10.3390/ijms20030687), 2019-02-05
Supplement: s1 [file s1]

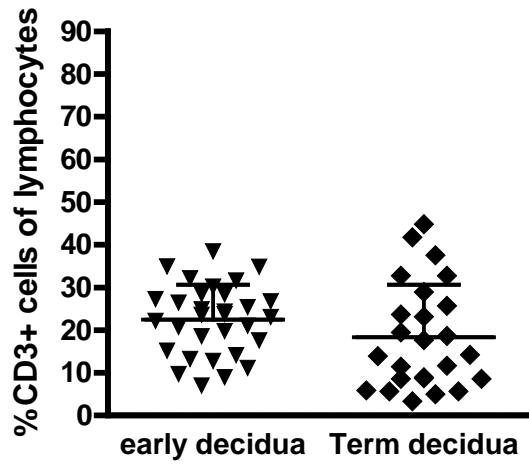

$p=0.1389$ , unpaired t test

The number of decidual T cells remained stable over the course of pregnancy and constitutes about 20% of decidual lymphocytes (unpublished paper, DimovaT).
